# Supplementary material for: Reactive intermediate phase cold sintering in strontium titanate
Source: Royal Society of Chemistry journal article supplement (doi:10.1039/c8ra03072c), 2018-01-01
Supplement: c8ra03072c1.pdf [file c8ra03072c1.pdf]

## Supporting Information

**Title:** Reactive intermediate phase cold sintering in strontium titanate

*Rebecca Boston\*, Jing Guo, Shuichi Funahashi, Amanda L. Baker, Ian M. Reaney and Clive A. Randall*

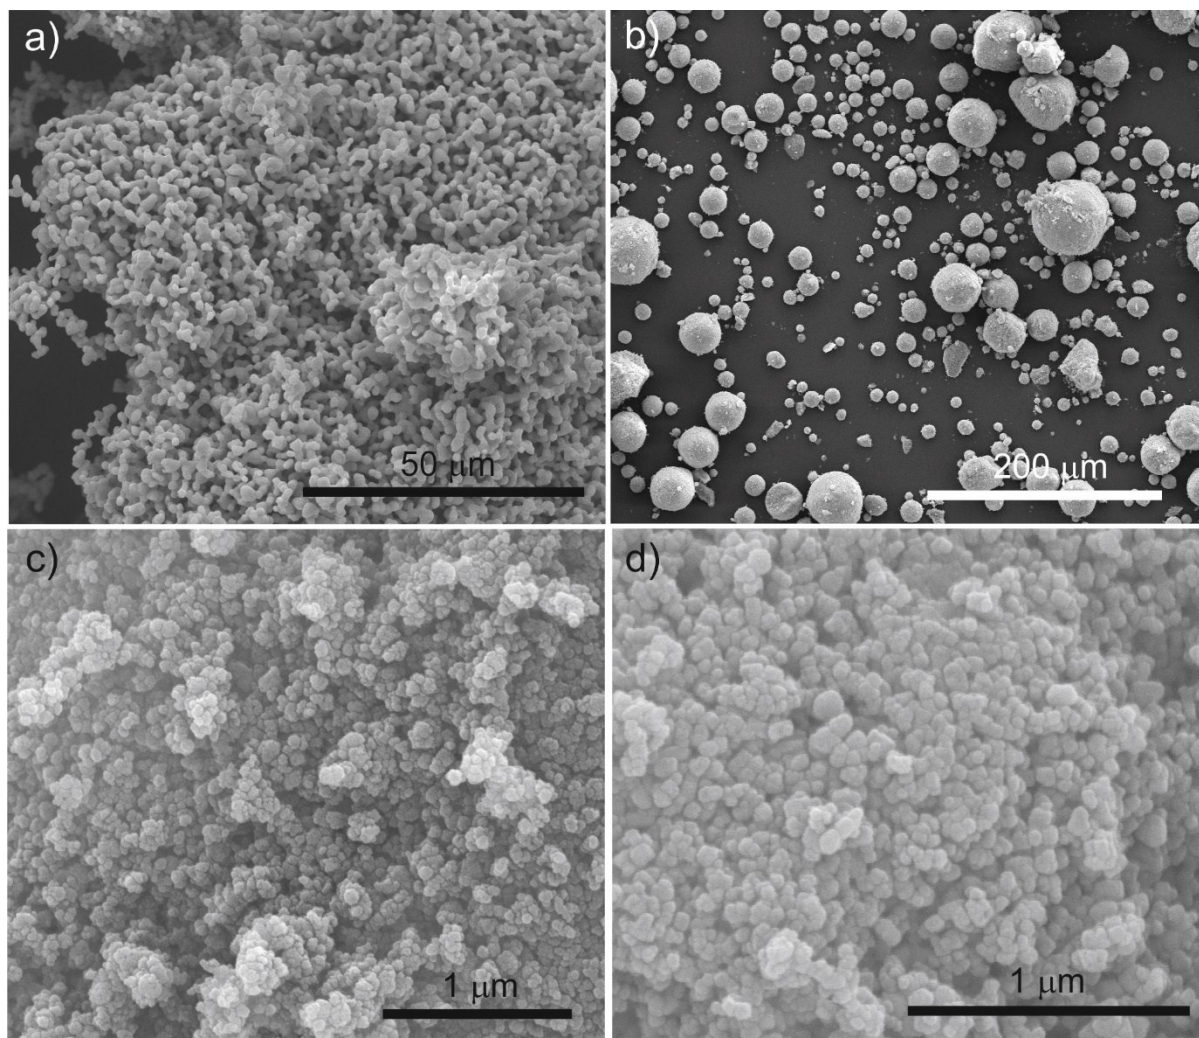

**Figure S1.** SEM micrographs of a) the in-house-synthesised solid state SrTiO<sub>3</sub> b) the as-received SrTiO<sub>3</sub> nanopowder which was agglomerated into large particles, c) a higher-magnification image of the SrTiO<sub>3</sub> nanopowder showing the crystallite size, and d) the as-received TiO<sub>2</sub> powder.

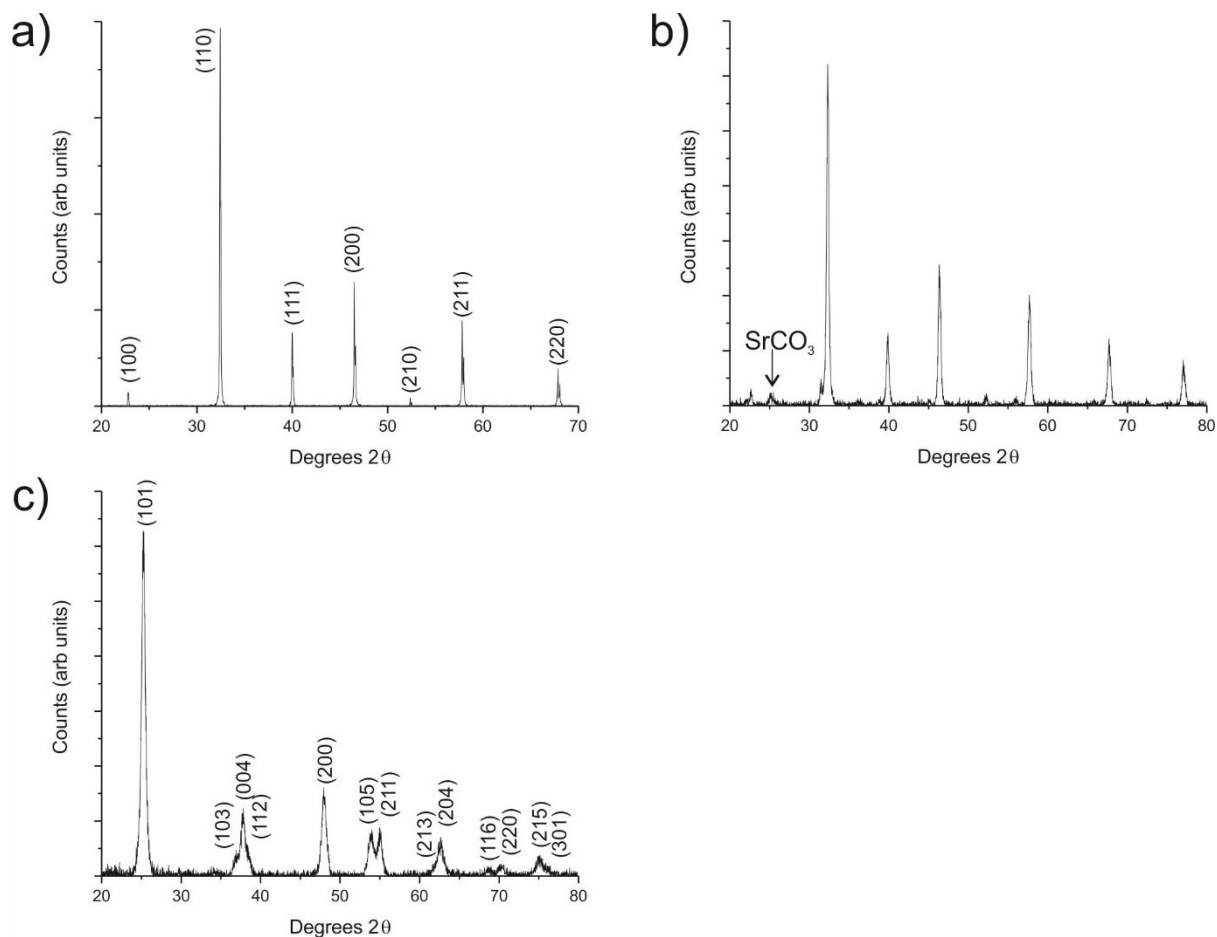

**Figure S2.** XRD patterns of a) the in house-produced solid state  $\text{SrTiO}_3$  starting powder indexed to a cubic cell, b) the as-received nano- $\text{SrTiO}_3$  powder which contains some  $\text{SrCO}_3$  phase, and c) the as- received nano  $\text{TiO}_2$  powder which showed significant peak broadening due to the particle size.

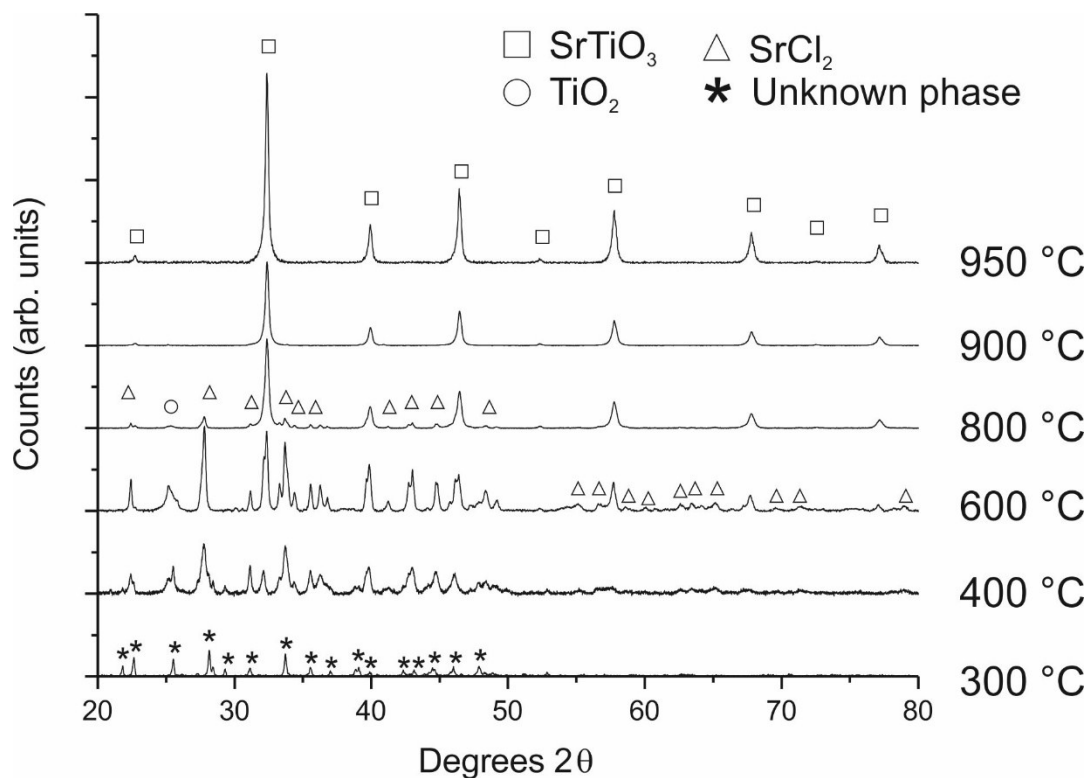

**Figure S3.** XRD of deep eutectic solvent-synthesised powders calcined at different temperatures. An unknown phase is present below 400 °C, possibly a titanium-organic complex. By 400 °C, this is reacted to form strontium chloride and titanium dioxide, which persist until 900 °C. At 600 °C, the first indication of SrTiO<sub>3</sub> is observed. By 950 °C, the intermediate phases have reacted to produce phase pure strontium titanate.

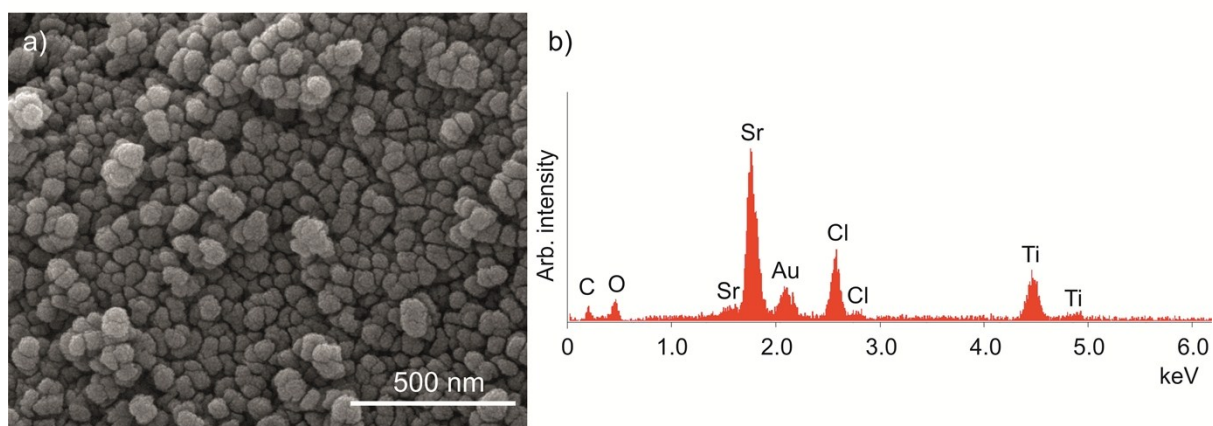

**Figure S4.** a) SEM and b) corresponding EDXA of a nanopowder ceramic which has been undergone the heated pressing step but has not been heated to 950 °C. The EDXA demonstrates the presence of chlorine (as crystalline strontium chloride) which is later lost in the post-press heating step.

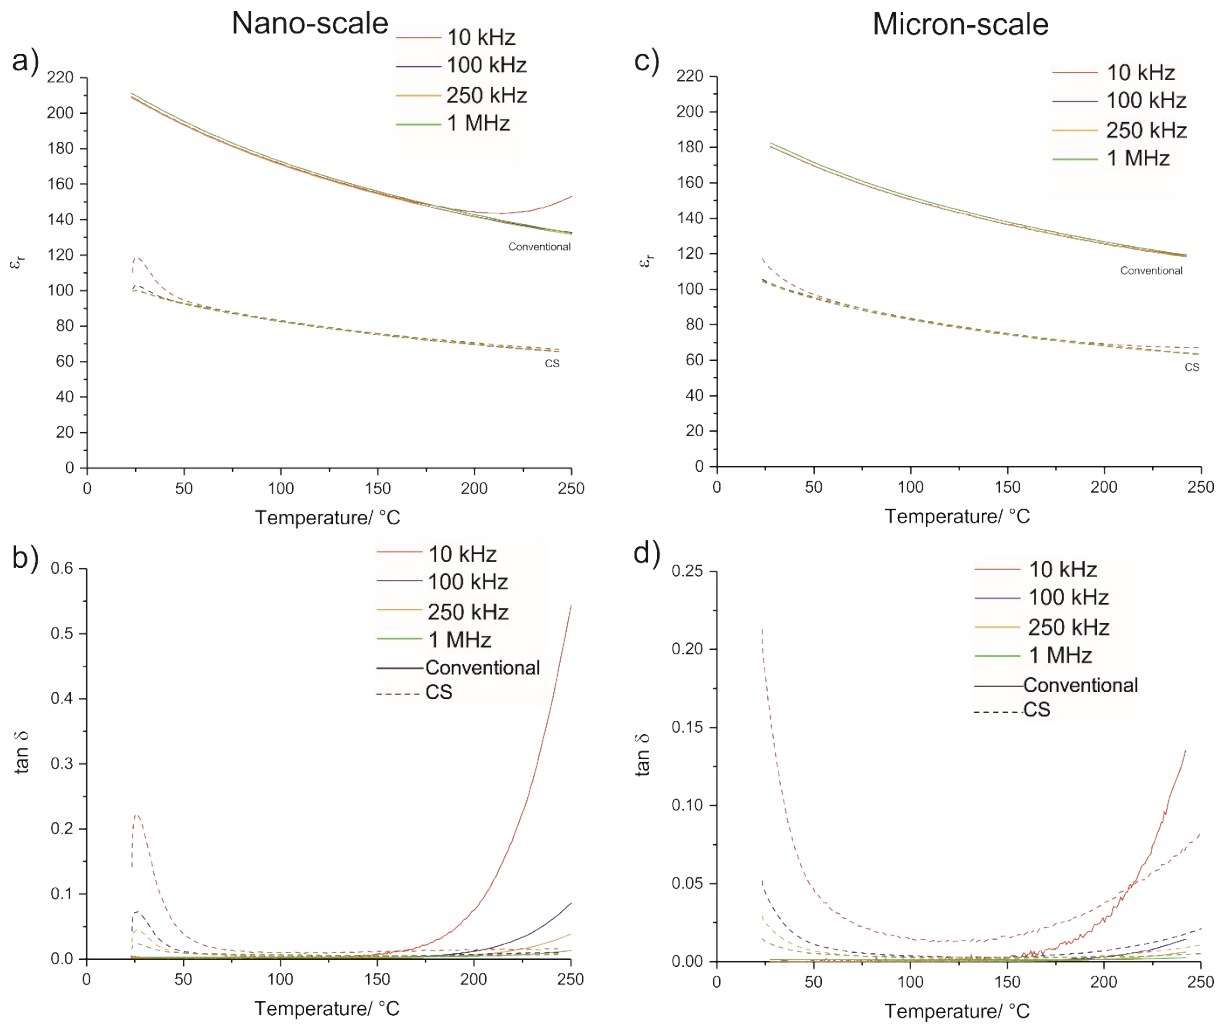

**Figure S5.** Relative permittivity and loss tangent data for a) and b) nanoscale samples sintered using CS and conventional processes (1400  $^{\circ}\text{C}$ , 6h) and c) and d) microscale samples.
